# Supplementary material
Source: Frontiers journal article supplement (https://www.frontiersin.org/articles/116263)
Supplement: Presentation_1.PDF [file Presentation_1.PDF]

## Supplementary material for

### *New transposon tools tailored for metabolic engineering of Gram-negative microbial cell factories*

by

Esteban Martínez-García, Tomás Aparicio, Víctor de Lorenzo, and Pablo I. Nikel

**Fig. S1.** Flowchart followed for the construction of vector p-R-SETA111.

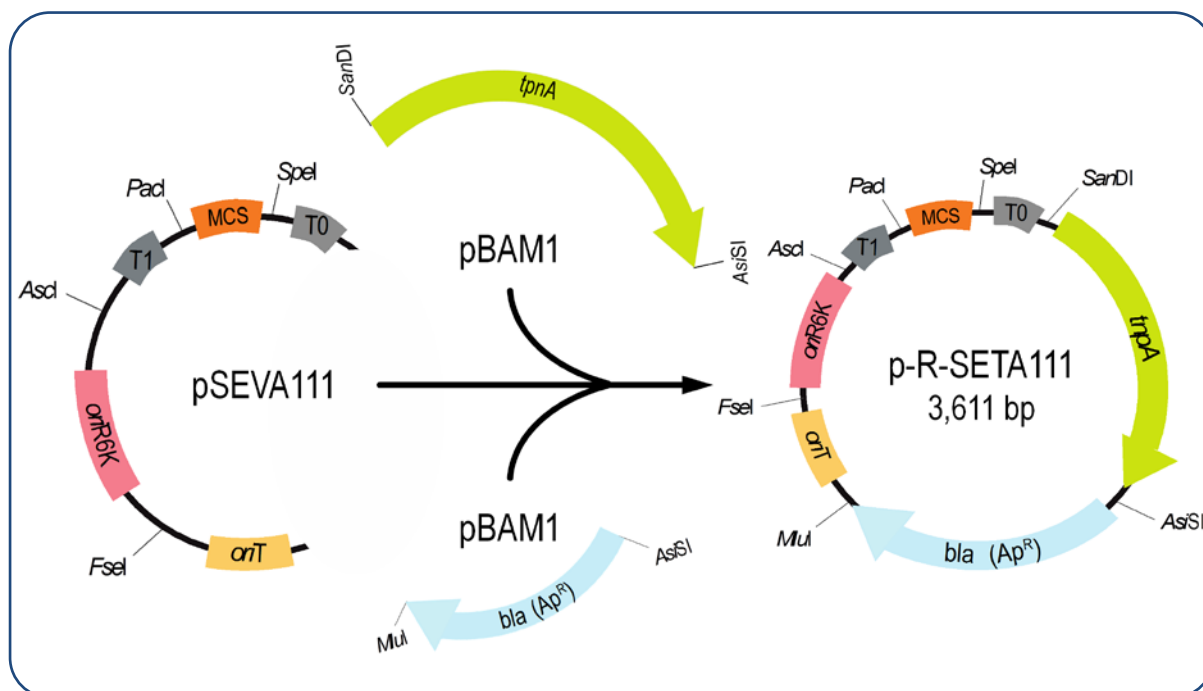

In the first step, the pBAM1 vector (Martínez-García et al., 2011) was used as the template to amplify the *bla* gene (conferring resistance to ampicillin) using primers Ap-AsSI-F and Ap-MuI-R (see Table S1 for sequence details), which substitute the original *Swa*I and *Psh*AI restriction sites by target recognition sites for *As*SI and *Mu*I, respectively. The transcriptional control of *bla* through the native P3 promoter (Brosius et al., 1982) was left intact. The DNA backbone of plasmid pSEVA111 (Silva-Rocha et al., 2013) was amplified by PCR with the SEVA111-F and SEVA111-R oligonucleotide pair to obtain the second DNA fragment. Finally, the *tnpA* gene from pBAM1 was obtained using the oligonucleotides *tnpA*-SanDI-F and *tnpA*-AsSI-R, that add the corresponding *San*DI and *As*SI restriction sites to the amplified fragment. These fragments were joined together by isothermal assembly as described by Gibson et al. (2009).

**Table S1.** Oligonucleotides used in this study.

| Oligonucleotide               | Sequence (5' → 3') <sup>a</sup>                                                   | Use and reference                                                      |
|-------------------------------|-----------------------------------------------------------------------------------|------------------------------------------------------------------------|
| <i>tnpA</i> - <i>SanDI</i> -F | GCCGCCGGGCGTTTTTTTATTGGTGAGAATC<br>CAGGGGTCCCCTGGTTTAACTACACAAG                   | Amplification of <i>tnpA</i>                                           |
| <i>tnpA</i> - <i>Asi</i> SI-R | CTCATTAGGCGGGCTACTAGCGATCGCCGA<br>TTAGATTTTAATGCC                                 | Amplification of <i>tnpA</i>                                           |
| Ap- <i>Asi</i> SI-F           | GGGCATTAATAATCTAATCGGCGATCGCTAG<br>TAGCCCGCCTAATGAG                               | Amplification of <i>bla</i>                                            |
| Ap- <i>Mlu</i> I-R            | TAATGACCCCGAAGCAGGGTTATGCAGCGG<br>AAAAGGACAA <b>ACGCGT</b> GTCCAAAAAAAAG<br>GCTCC | Amplification of <i>bla</i>                                            |
| SEVA111-F                     | TTGTCCTTTTCCGCTGCATAAC                                                            | Amplification of the pSEVA111 plasmid backbone                         |
| SEVA111-R                     | GACCCCTGGATTCTCACC                                                                | Amplification of the pSEVA111 plasmid backbone                         |
| <i>tnpA</i> -Check-F          | ATGCGGATGAAAAAGAAAG                                                               | Sequencing                                                             |
| <i>tnpA</i> -Check-R          | ACACGTTGAAAGCCAGAG                                                                | Sequencing                                                             |
| Ap-Check-F                    | TGGGCTATATTGAACTGGAT                                                              | Sequencing                                                             |
| PS1                           | AGGGCGGCGGATTTGTCC                                                                | Checking / sequencing (Silva-Rocha et al., 2013)                       |
| PS2                           | GCGGCAACCGAGCGTTC                                                                 | Checking / sequencing (Silva-Rocha et al., 2013)                       |
| PS4                           | CCAGCCTCGCAGAGCAGG                                                                | Checking absence of pBAMDs plasmid backbone (Silva-Rocha et al., 2013) |
| PS5                           | CCCTGCTTCGGGGTCATT                                                                | Checking absence of pBAMDs plasmid backbone (Silva-Rocha et al., 2013) |
| PS6                           | GGACAAATCCGCCGCCCT                                                                | Checking absence of pBAMDs plasmid backbone (Silva-Rocha et al., 2013) |

<sup>a</sup> Recognition sites for the restriction enzymes specified in the table are indicated in bold in the DNA sequence.

**Table S2.** Identification of the chromosomal locus of insertion of the *phaC1AB1* gene cluster from *Cupriavidus necator* in selected *Escherichia coli* JW2293-1 transconjugants<sup>a</sup>.

| Clone | Gene        | Locus        | Genome coordinate (bp) | Gene name and putative function                 | PHB accumulation level <sup>b</sup> |
|-------|-------------|--------------|------------------------|-------------------------------------------------|-------------------------------------|
| 1     | <i>ykgH</i> | <i>b0310</i> | 324,097                | Predicted inner membrane protein                | +++                                 |
| 2     | <i>betB</i> | <i>b0312</i> | 326,772                | Betaine aldehyde dehydrogenase                  | +++                                 |
| 3     | <i>ligB</i> | <i>b3467</i> | 3,817,737              | NAD <sup>+</sup> -dependent DNA ligase          | +                                   |
| 4     | <i>yagF</i> | <i>b0269</i> | 284,181                | CP4-6 prophage, D-xylonate dehydratase          | ++                                  |
| 5     | <i>yadM</i> | <i>b0138</i> | 152,722                | Predicted fimbrial-like adhesin protein         | +++                                 |
| 6     | <i>ecpR</i> | <i>b0294</i> | 310,037                | MatA DNA-binding transcriptional dual regulator | ++                                  |
| 7     | <i>yadC</i> | <i>b0135</i> | 150,509                | Predicted fimbrial-like adhesin protein         | +                                   |
| 8     | <i>ydeT</i> | <i>b1505</i> | 1,588,014              | Predicted mercury detoxification protein        | +                                   |
| 9     | <i>pncA</i> | <i>b1769</i> | 1,850,463              | YdjE major facilitator superfamily transporter  | ++                                  |
| 10    | <i>yahE</i> | <i>b0319</i> | 335,614                | Predicted protein of unknown function           | +                                   |
| 11    | <i>yadV</i> | <i>b0140</i> | 155,969                | Probable pilin chaperone similar to PapD        | +                                   |

<sup>a</sup> The insertion sites were ascertained by means of arbitrary PCR with the oligonucleotides indicated in Table 2 in the main text, and the assigned function of the corresponding ORF is given according to the information available in the EcoCyc Database (Keseler et al., 2011).

<sup>b</sup> The poly(3-hydroxybutyrate) (PHB) accumulation level was qualitatively assessed by fluorimetry after viable staining with Nile red as indicated in the *Materials and methods* section in the main text. Individual clones were classified according to their PHB levels as + ≤ 15%, 15% < ++ ≤ 40%, and +++ > 40%; where the accumulation percentages correspond to the comparison with *E. coli* S17P (strain S17-1  $\lambda$ *pir* carrying plasmid pAeT41, *phaC1AB1*<sup>+</sup>; see Table 1 in the main text), used as a positive control in the polymer determination assay.

## References

- Brosius, J., Cate, R.L. and Perlmutter, A.P. (1982) Precise location of two promoters for the *b*-lactamase gene of pBR322. S1 mapping of ribonucleic acid isolated from *Escherichia coli* or synthesized in vitro. *J. Biol. Chem.* 257: 9205-9210.
- Gibson, D.G., Young, L., Chuang, R.Y., Venter, J.C., Hutchison, C.A. and Smith, H.O. (2009) Enzymatic assembly of DNA molecules up to several hundred kilobases. *Nat. Methods.* 6: 343-345.
- Keseler, I.M., Collado-Vides, J., Santos-Zavaleta, A., Peralta-Gil, M., Gama-Castro, S., Muñoz-Rascado, L., Bonavides-Martinez, C., Paley, S., Krummenacker, M., Altman, T., Kaipa, P., Spaulding, A., Pacheco, J., Latendresse, M., Fulcher, C., Sarker, M., Shearer, A.G., Mackie, A., Paulsen, I., Gunsalus, R.P. and Karp, P.D. (2011) EcoCyc: a comprehensive database of *Escherichia coli* biology. *Nucleic Acids Res.* 39: D583-D590.
- Martínez-García, E., Calles, B., Arévalo-Rodríguez, M. and de Lorenzo, V. (2011) pBAM1: an all-synthetic genetic tool for analysis and construction of complex bacterial phenotypes. *BMC Microbiol.* 11: 38.
- Silva-Rocha, R., Martínez-García, E., Calles, B., Chavarría, M., Arce-Rodríguez, A., de Las Heras, A., Páez-Espino, A.D., Durante-Rodríguez, G., Kim, J., Nikel, P.I., Platero, R. and de Lorenzo, V. (2013) The Standard European Vector Architecture (SEVA): a coherent platform for the analysis and deployment of complex prokaryotic phenotypes. *Nucleic Acids Res.* 41: D666-D675.
